# Supplementary material
Source: PubMed Central journal article supplement (PMC2659183)
Supplement: M900640200_1.pdf [file M900640200_1.pdf]

**Functional Characterization of *tImK* Unveiling Unstable Carbinolamide Intermediates in the Tallysomyacin Biosynthetic Pathway\***

**Liyan Wang<sup>‡1</sup>, Meifeng Tao<sup>‡1</sup>, Evelyn Wendt-Pienkoski<sup>‡</sup>, Ute Galm<sup>‡</sup>, Jane M. Coughlin<sup>§</sup>, and Ben Shen<sup>‡§¶2</sup>**

From the <sup>‡</sup>Division of Pharmaceutical Sciences, <sup>§</sup>Department of Chemistry, and <sup>¶</sup>University of Wisconsin National Cooperative Drug Discovery Group, University of Wisconsin-Madison, Madison, WI 53705-2222, U.S.A

Running head: Unstable carbinolamide intermediates in tallysomyacin biosynthesis.

<sup>¶</sup>Equal Contribution

<sup>2</sup>To whom correspondence should be addressed: 777 Highland Ave., Madison, WI 53705. Tel: (608) 263-2673; Fax: (608) 262-5245; Email: [bshen@pharmacy.wisc.edu](mailto:bshen@pharmacy.wisc.edu).

**SUPPLEMENTAL DATA**

|                                                              |    |
|--------------------------------------------------------------|----|
| EXPERIMENTAL PROCEDURES                                      | S2 |
| TABLE S1. Plasmids used in this study                        | S3 |
| TABLE S2. Bacterial strains used in this study               | S4 |
| TABLE S3. Oligonucleotides as PCR primers used in this study | S5 |
| REFERENCES                                                   | S6 |

## EXPERIMENTAL PROCEDURES

*Breaklight assay*—Breaklight assay of the DNA cleavage activity of TLM A, TLM K-1(Cu-free) and TLM K-2 was carried out according to the literature procedure (1). A labeled oligonucleotide (i.e. breaklight), 5'-6-FAM-GGGTTAAGGGTTTTCCCTTAACCC-3'BHQ1 with a 5'-6-carboxyfluorescein (5'-6-FAM) and a 3'-Black Hole Quencher 1 (BHQ1), was purchased from Integrated DNA Technologies (Coralville, IA) and used as the DNA substrate. The assay mixture contains TLM A (200 nM), K-1 (Cu-free) (0.2  $\mu$ M) or K-2 (0.2  $\mu$ M), respectively, and 3.2 nM of the labeled oligonucleotide in 25 mM Tris-HCl buffer (pH7.5). The assay reaction was initiated by addition of  $(\text{NH}_4)_2\text{Fe}(\text{SO}_4)_2$ . All samples were filtered before analysis. The reactions were monitored over 5 min with a FluoroMax-3 spectrofluorometer equipped with DataMax for Windows (Instruments SA, Edison, NJ), and analyzed via a time base scan ( $\lambda_{\text{ex}}=485$  nm,  $\lambda_{\text{em}}=517$  nm) in a Suprasil quartz cuvette (10-mm path) fitted with a magnetic stirring bar in a total volume of 2 mL. The temperature was controlled by a Haake Circulator DC10 set to 37 °C. Total cleavage of the breaklight was defined as the fluorescence emission under saturated cleaving conditions, 2 mg/mL DNase I, 37 °C, 4 hr. Emission units were converted to the amount of labeled oligonucleotide used within a procedure, thereby equating labeled oligonucleotide degradation as a function of the emission of fluorescence.

TABLE S1. Plasmids used in this study.

| Plasmids  | Description                                                                                                                       | Source/reference |
|-----------|-----------------------------------------------------------------------------------------------------------------------------------|------------------|
| SuperCos1 | Cosmid vector containing a neomycin/kanamycin resistance gene ( <i>neo</i> )                                                      | Stratagene       |
| pIJ780    | $\lambda$ RED-mediated PCR-targeting vector containing a viomycin resistance gene ( <i>vph</i> )                                  | (2)              |
| pBS8004   | $\Phi$ C31-derived integrative vector containing an <i>aac(3)IV-tsr-oriT</i> cassette                                             | (3)              |
| pBS8008   | Cosmid containing downstream part of the <i>tlm</i> cluster and an <i>aac(3)IV-tsr-oriT</i> cassette                              | (3)              |
| pBS8010   | $\lambda$ RED-mediated PCR-targeting vector, derived from pBS8008, containing a neomycin-kanamycin resistance gene ( <i>neo</i> ) | This study       |
| pBS8011   | Cosmid containing downstream part of the <i>tlm</i> cluster, with <i>tlmK</i> replaced by <i>neo</i>                              | This study       |
| pBS8012   | Cosmid carrying the $\Delta$ <i>tlmK</i> in-frame deletion                                                                        | This study       |
| pBS8013   | Integrative expression vector carrying <i>ErmE</i> * promoter and $\Phi$ C31 integration function                                 | This study       |
| pBS8014   | pBS8013-derived construct for $\Delta$ <i>tlmK</i> complementation in which the expression of <i>tlmK</i> is under <i>ErmE</i> *  | This study       |

TABLE S2. Bacterial strains used in this study

| Strains                               | Description            | Source/reference         |
|---------------------------------------|------------------------|--------------------------|
| <i>Escherichia coli</i>               |                        |                          |
| DH5 $\alpha$                          |                        | (4)                      |
| ET12567                               |                        | (5)                      |
| BW25113/pIJ790                        |                        | (2)                      |
| BT340                                 |                        | (2)                      |
| <i>Streptoalloteichus hindustanus</i> |                        |                          |
| E465-94 (ATCC31158)                   | Wild type TLM producer | ATCC, Rockville, MD, USA |
| SB8003                                | $\Delta$ tlmK          | This study               |
| SB8004                                | $\Delta$ tlmK /pBS8014 | This study               |

TABLE S3. Oligonucleotides as PCR primers used in this study

| Oligonucleotides                                                       | Sequence                                                                                                                                                                                                                                                        |
|------------------------------------------------------------------------|-----------------------------------------------------------------------------------------------------------------------------------------------------------------------------------------------------------------------------------------------------------------|
| For replacement of <i>vph</i> in pIJ780 with <i>neo</i> from SuperCos1 |                                                                                                                                                                                                                                                                 |
| neo-FRT1                                                               | 5'-G TTCCTATTCTCTAGAAAGTATAGGAACTTCGAAGTTCCCACGCTG<br>CCGCAAGCACTCAG-3'                                                                                                                                                                                         |
| neo-FRT2                                                               | 5'-CTATACTTTCTAGAGAATAGGAACTTCGGAATAGGAACTTGCTAGC<br>TTGGTCGGTCATTTCTGAACC-3'                                                                                                                                                                                   |
| For replacement of <i>tImK</i> with FRT- <i>neo</i>                    |                                                                                                                                                                                                                                                                 |
| tImK-frt1                                                              | 5'-ccctgatcccgcccccaacgaaggaagccgcatgATTCCGGGGATCCGTCGAC<br>C-3'                                                                                                                                                                                                |
| tImK-frt2                                                              | 5'-ccggagcgggatggcgctttctaccactcccggtcaTGTAGGCTGGAGCTGCTTC-3'<br>(Low case letters represent DNA sequence originating from <i>S. hindustanus</i><br>E465-94 and upper case letter represent DNA sequence flanking the FRT- <i>neo</i><br>cassette from pBS8101) |
| For PCR and Southern blot verification of mutant strain                |                                                                                                                                                                                                                                                                 |
| tImK-up                                                                | 5'-CGCTGACAGCGCCGTCTGGG-3'                                                                                                                                                                                                                                      |
| tImK-down                                                              | 5'-GGCGTTGAGCATCGGGGTGG-3'                                                                                                                                                                                                                                      |
| For cloning of the <i>ErmE</i> * promoter                              |                                                                                                                                                                                                                                                                 |
| PermEI-f                                                               | 5'-GGAATTCGTGATGCTAGTCGCGGTTGATC-3'                                                                                                                                                                                                                             |
| PermEI-r                                                               | 5'-GGAATTCGTAATCATGCATTATCTCCTTCTCGCTGGATCCTACCAA<br>CCGG-3'                                                                                                                                                                                                    |
| For cloning of <i>tImK</i>                                             |                                                                                                                                                                                                                                                                 |
| tImK-NsiI                                                              | 5'-TCCAATGCATGGGCCAGTCCTGGTGGTC-3'                                                                                                                                                                                                                              |
| tImK-XbaI                                                              | 5'-GCTCTAGATCAGGCCCGGCGGGGAGAT-3'                                                                                                                                                                                                                               |

## REFERENCES

1. Biggins, J. B., Prudent, J. R., Marshall, D. J., Ruppen, M., and Thorson, J. S. (2000) *Proc. Natl. Acad. Sci. U. S. A.* **97**, 13537-13542
2. Gust, B., Challis, L., Fowler, K., Kieser, T., and Chater, F. (2003) *Proc. Natl. Acad. Sci. U. S. A.* **100**, 1541-1546
3. Tao, M., Wang, L., Wendt-Pienkowski, E., George, N. P., Galm, U., Zhang, G., Coughlin, J. M., and Shen, B. (2007) *Mol. BioSyst.* **3**, 60-74
4. Sambrook, J., and Russell, W. (2001) *Molecular Cloning: a Laboratory Manual*. 3<sup>rd</sup> Ed., Cold Spring Harbor Laboratory Press: New York
5. MacNeil, J., Gewain, M., Ruby, L., Dezeny, G. Gibbons, H., and MacNeil, T. (1992) *Gene*, **111**, 61-68
